# Supplementary material
Source: HighWire-hosted journal article supplement (doi:10.1101/rna.080834.125)
Supplement: Supplemental_Fig_S1.pdf [file Supplemental_Fig_S1.pdf]

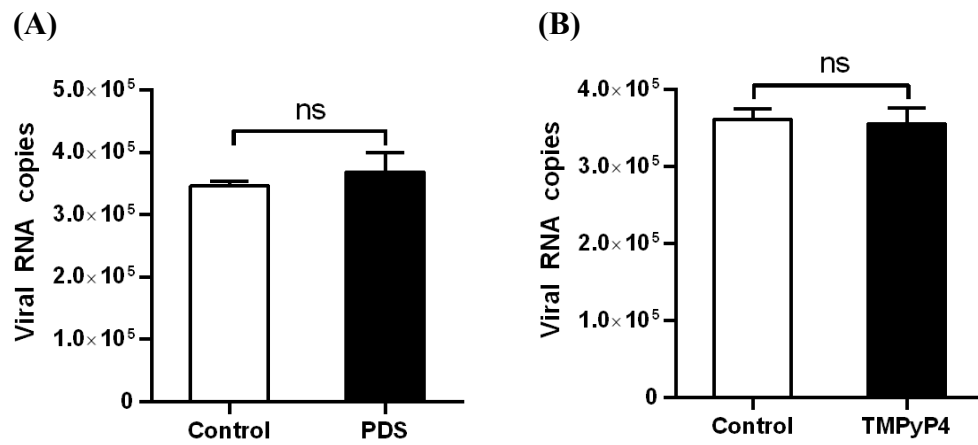

**Figure S1. PDS and TMPyP4 did not affect the entry of PDCoV. (A, B)** LLC-PK1 cells were infected with PDCoV (MOI = 1) at 4°C for 1h. After twice washes with ice-cold PBS, cells were cultured at 37°C in the absence or presence of PDS (A) or TMPyP4 (B) for 1h, followed by RT-qPCR.
