# Supplementary material
Source: HighWire-hosted journal article supplement (doi:10.1101/rna.080834.125)
Supplement: Supplemental_Fig_S2.pdf [file Supplemental_Fig_S2.pdf]

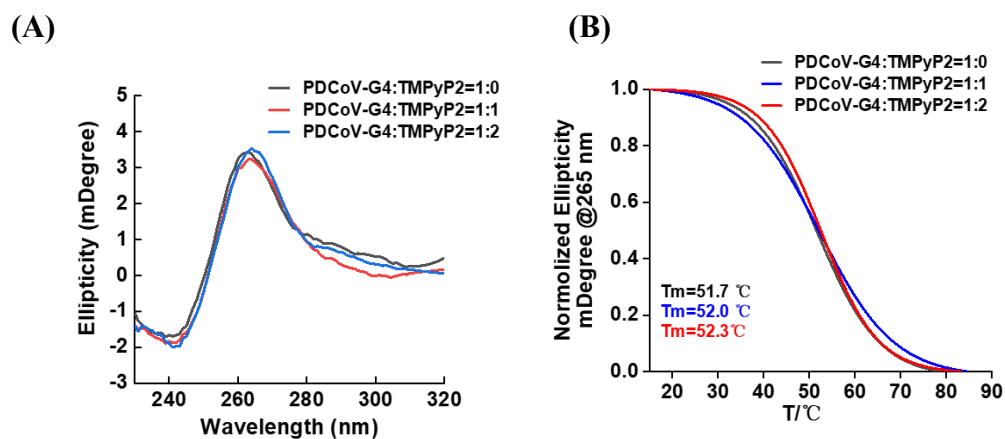

**Figure S2. TMPyP2 did not affect the topological conformation or the thermal stability of PDCoV-G4.** (A) CD spectra analysis of PDCoV-G4 in the presence of different concentrations of TMPyP2. (B) The normalized data from the CD thermal melting curves of PDCoV-G4 in the presence of different concentrations of TMPyP2.
