# Supplementary material
Source: HighWire-hosted journal article supplement (doi:10.1101/rna.080834.125)
Supplement: Supplemental_Table_S1.pdf [file Supplemental_Table_S1.pdf]

**Table S1. Characteristics of the 12 putative G-quadruplexes**

| PQS names | Sequences                                                 | position | G-score |            |           | Normalized and summed G-scores |
|-----------|-----------------------------------------------------------|----------|---------|------------|-----------|--------------------------------|
|           |                                                           |          | QGRS    | G4Catchall | pqsfinder |                                |
| P1        | GGCGGAATGGG<br>AGCGTGAGG<br>GGCTACGTGGG                   | nsp8     | 20      | 1.1        | 20        | 2.54                           |
| P2        | GATTCTCGGGAC<br>GG                                        | nsp14    | 22      | 1.16       | 14        | 2.45                           |
| P3        | GGCACTGAGGTT<br>AAGGTTGG                                  | nsp2     | 22      | 0.75       | 20        | 2.38                           |
| P4        | GGTAGGTAGGC<br>TCTATAAGG<br>GGTATCCTTGTG                  | nsp2     | 20      | 0.7        | 20        | 2.13                           |
| P5        | GTGTTTAGGCAG<br>G                                         | nsp13    | 19      | 0.52       | 14        | 1.49                           |
| P6        | GGCTATGGAAG<br>GTGAAGATGAT<br>AGTGG                       | nsp3     | 15      | 0.704      | 11        | 1.10                           |
| P7        | GGAAAATTCCGT<br>GGTGACCAGTG<br>GACTCACATGG<br>GGCAGGCGGGC | nsp5     | 24      | 0.235      | 3         | 1.05                           |
| P8        | TTGTTTCACTAA<br>TGG<br>GGCTGCTCTTAG                       | nsp14    | 14      | 0.654      | 12        | 1.01                           |
| P9        | CTGGTGGCTAGC<br>TGG<br>GGACATGCGCC                        | nsp6     | 15      | 0.481      | 11        | 0.87                           |
| P10       | AGGCGCGTCCTT<br>GGAAGG<br>GGTGGTTCATGA                    | nsp14    | 18      | 0.276      | 9         | 0.84                           |
| P11       | TATTGGTAACCC<br>AAAAGG<br>GGCACAGGTCC                     | nsp14    | 16      | 0.233      | 8         | 0.54                           |
| P12       | CAGAGGAAATC<br>TTAAGTATGG                                 | N        | 17      | 0.188      | 5         | 0.42                           |
