# Supplementary material
Source: HighWire-hosted journal article supplement (doi:10.1101/rna.080834.125)
Supplement: Supplemental_Table_S2.pdf [file Supplemental_Table_S2.pdf]

**Table S2. Synthetic sequences of G4 RNAs and their mutants**

| Name        | Nucleotide sequence (5' - 3')                    |
|-------------|--------------------------------------------------|
| PQS-nsp8    | GGCGGAAUGGGAGCGUGAGG                             |
| PQS-nsp8mut | GGC <u>A</u> GAAUGGGGA <u>A</u> CGUGA <u>A</u> G |
| PQS-nsp14   | GGCUACGUGGGGAUUCUCGGGACGG                        |
| PQS-nsp2    | GGCACUGAGGUUAAGGUUGG                             |
