# Supplementary material
Source: HighWire-hosted journal article supplement (doi:10.1101/rna.080834.125)
Supplement: Supplemental_Table_S3.pdf [file Supplemental_Table_S3.pdf]

**Table S3. Primers used for RT-qPCR and the construction of recombinant plasmid pBAC-DHeB1 with G4-disruptive mutations**

| <b>Primer</b>  | <b>Nucleotide sequence (5' - 3')</b>                                                 |
|----------------|--------------------------------------------------------------------------------------|
| qPDCoV-N-F     | AGCTGCTACCTCTCCGATTC                                                                 |
| qPDCoV-N-R     | ACATTGGCACCAGTACGAGA                                                                 |
| sgPDCoV-nsp8a  | TTCTAATACGACTCACTATAGGTATTAACATGTTGAGCATGTT<br>TTAGAGCTAGA                           |
| sgPDCoV-nsp8b  | TTCTAATACGACTCACTATAGGCAACCCACTTGAGTATGAGTT<br>TTAGAGCTAGA                           |
| scaffold oligo | AAAAGCACCGACTCGGTGCCACTTTTTCAAGTTGATAACGG<br>ACTAGCCTTATTTTAACTTGCTATTTCTAGCTCTAAAAC |
| PDCoV-nsp8-F   | TCTAGCTGATGCGGCCAATG                                                                 |
| PDCoV-nsp8-OR  | TACGCTGAGAAGCAGCTTCACGTTCCCATTCTGCCTT                                                |
| PDCoV-nsp8-OF  | AAGGCAGAATGGGAACGTGAAGCTGCTTCTCAGCGTA                                                |
| PDCoV-nsp8-R   | AGTCATACTGAAATCCATCA                                                                 |
